# Supplementary material for: Evaluation of Blood Levels of Omentin-1 and Orexin-A in Adults with Obstructive Sleep Apnea: A Systematic Review and Meta-Analysis
Source: MDPI journal article supplement (doi:10.3390/life13010245), 2023-01-16
Supplement: s1 [file s1]

**Table S1:** The Joanna Briggs Institute (JBI) Critical Appraisal Checklist for case-control studies

| <b>I. The Joanna Briggs Institute (JBI) Critical Appraisal Checklist for case-control study (last amended in 2017)</b>                                                                                                                                                                                                                                                             |                  |    |         |                |
|------------------------------------------------------------------------------------------------------------------------------------------------------------------------------------------------------------------------------------------------------------------------------------------------------------------------------------------------------------------------------------|------------------|----|---------|----------------|
| <b>Website:</b> <a href="https://joannabriggs.org/critical_appraisal_tools">https://joannabriggs.org/critical_appraisal_tools</a><br><a href="https://wiki.joannabriggs.org/display/MANUAL/Appendix+7.2+Critical+appraisal+checklist+for+case-control+studies">https://wiki.joannabriggs.org/display/MANUAL/Appendix+7.2+Critical+appraisal+checklist+for+case-control+studies</a> |                  |    |         |                |
| Major Components                                                                                                                                                                                                                                                                                                                                                                   | Response options |    |         |                |
| 1. Were the groups comparable other than the presence of disease in cases or the absence of disease in controls?                                                                                                                                                                                                                                                                   | Yes              | No | Unclear | Not applicable |
| 2. Were cases and controls matched appropriately?                                                                                                                                                                                                                                                                                                                                  | Yes              | No | Unclear | Not applicable |
| 3. Were the same criteria used for identification of cases and controls?                                                                                                                                                                                                                                                                                                           | Yes              | No | Unclear | Not applicable |
| 4. Was exposure measured in a standard, valid and reliable way?                                                                                                                                                                                                                                                                                                                    | Yes              | No | Unclear | Not applicable |
| 5. Was exposure measured in the same way for cases and controls?                                                                                                                                                                                                                                                                                                                   | Yes              | No | Unclear | Not applicable |
| 6. Were confounding factors identified?                                                                                                                                                                                                                                                                                                                                            | Yes              | No | Unclear | Not applicable |
| 7. Were strategies to deal with confounding factors stated?                                                                                                                                                                                                                                                                                                                        | Yes              | No | Unclear | Not applicable |
| 8. Were outcomes assessed in a standard, valid and reliable way for cases and controls?                                                                                                                                                                                                                                                                                            | Yes              | No | Unclear | Not applicable |
| 9. Was the exposure period of interest long enough to be meaningful?                                                                                                                                                                                                                                                                                                               | Yes              | No | Unclear | Not applicable |
| 10. Was appropriate statistical analysis used?                                                                                                                                                                                                                                                                                                                                     | Yes              | No | Unclear | Not applicable |

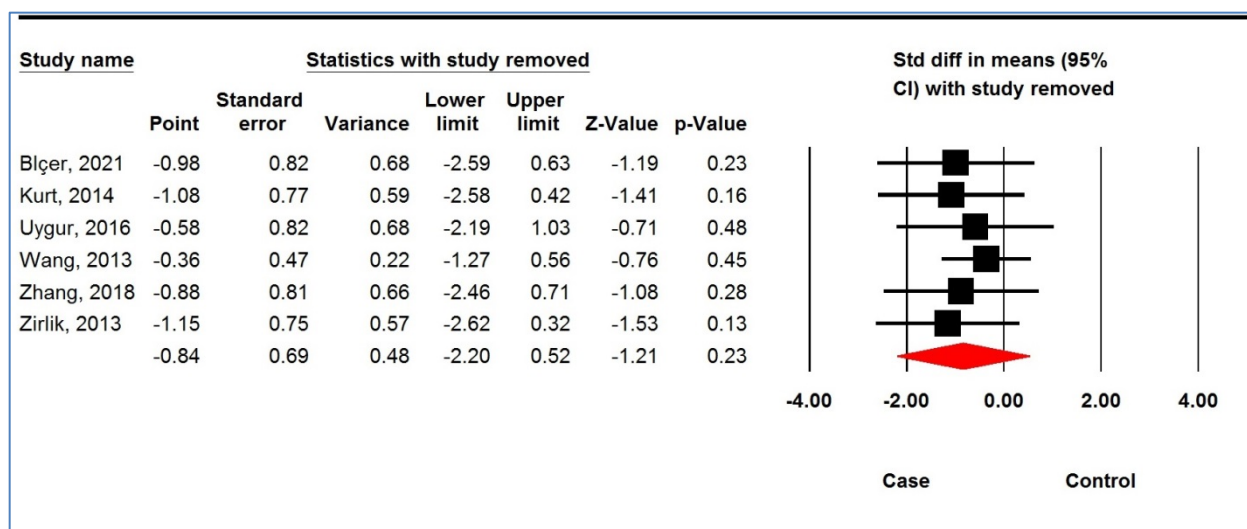

**Figure S1:** One-study-remove analysis of blood omentin-1 levels in adults with OSA compared to controls

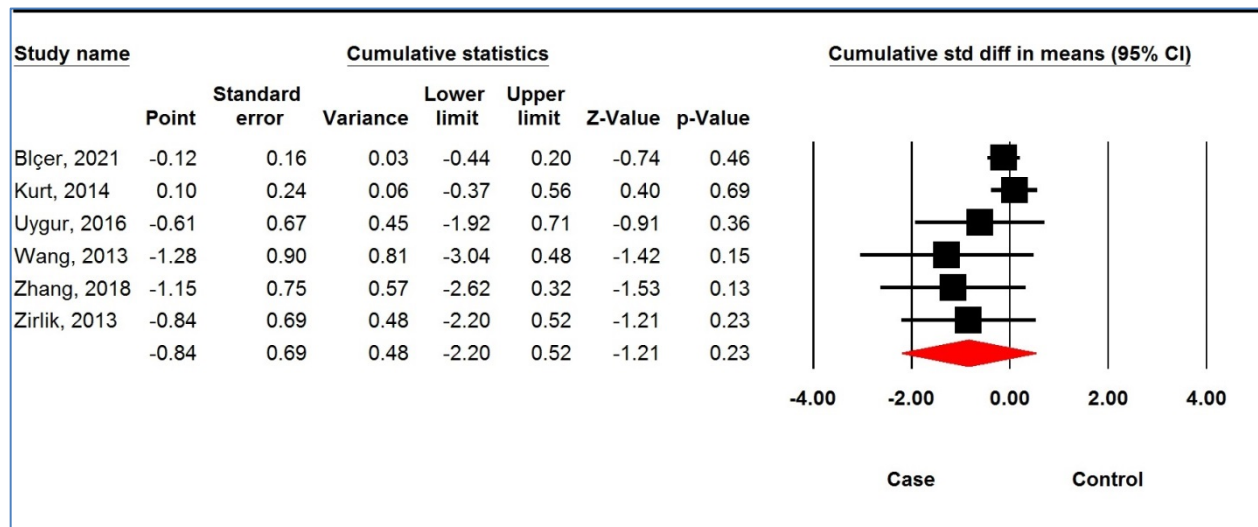

**Figure S2:** Cumulative analysis of blood omentin-1 levels in adults with OSA compared to controls

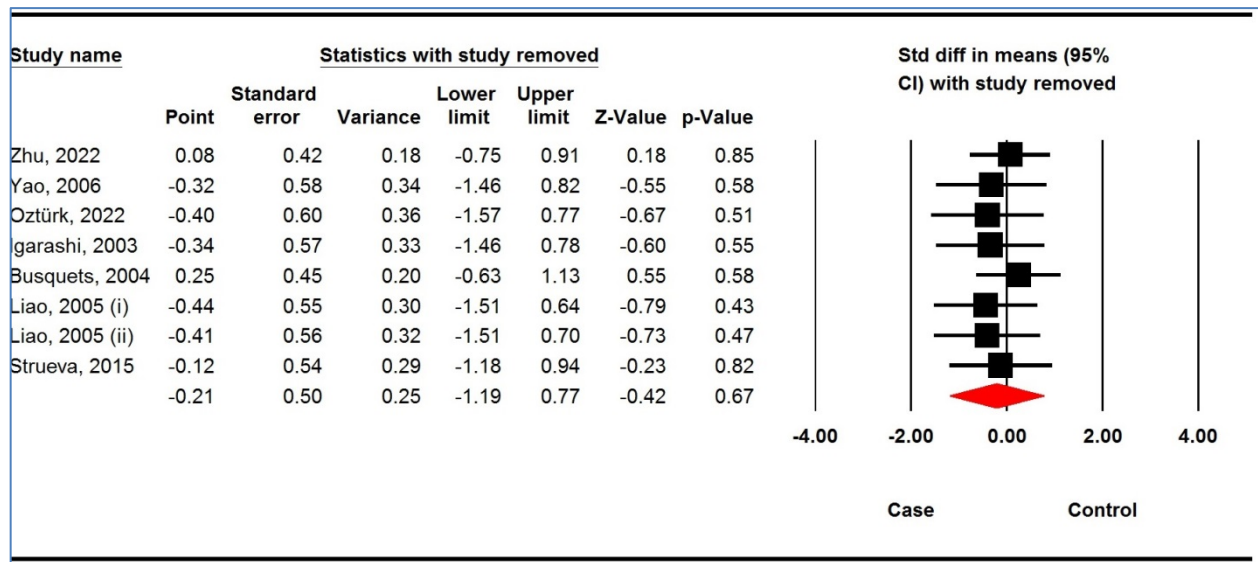

**Figure S3:** One-study-remove analysis of blood orexin-A levels in adults with OSA compared to controls

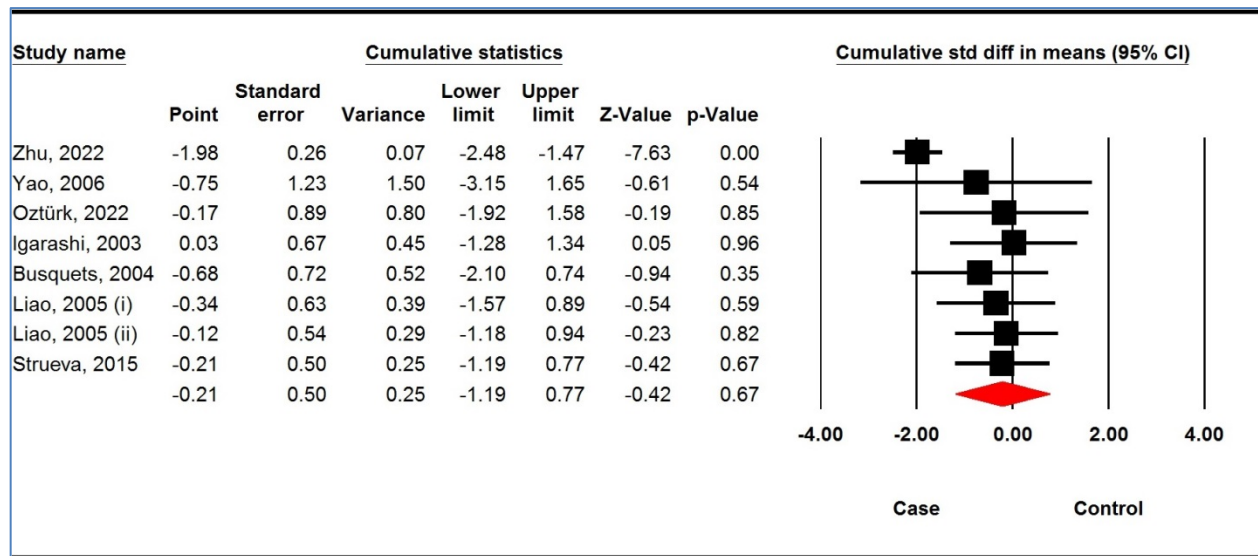

**Figure S4:** Cumulative analysis of blood orexin-A levels in adults with OSA compared to controls
